# Supplementary material for: Zirconium ferrite incorporated zeolitic imidazolate framework-8: a suitable photocatalyst for degradation of dopamine and sulfamethoxazole in aqueous solution
Source: RSC Adv. 2023 Mar 23;13(14):9563–75. doi: 10.1039/d3ra01055d (PMC10035307; doi:10.1039/d3ra01055d)
Supplement: RA-013-D3RA01055D-s001 [file RA-013-D3RA01055D-s001.pdf]

## Figures

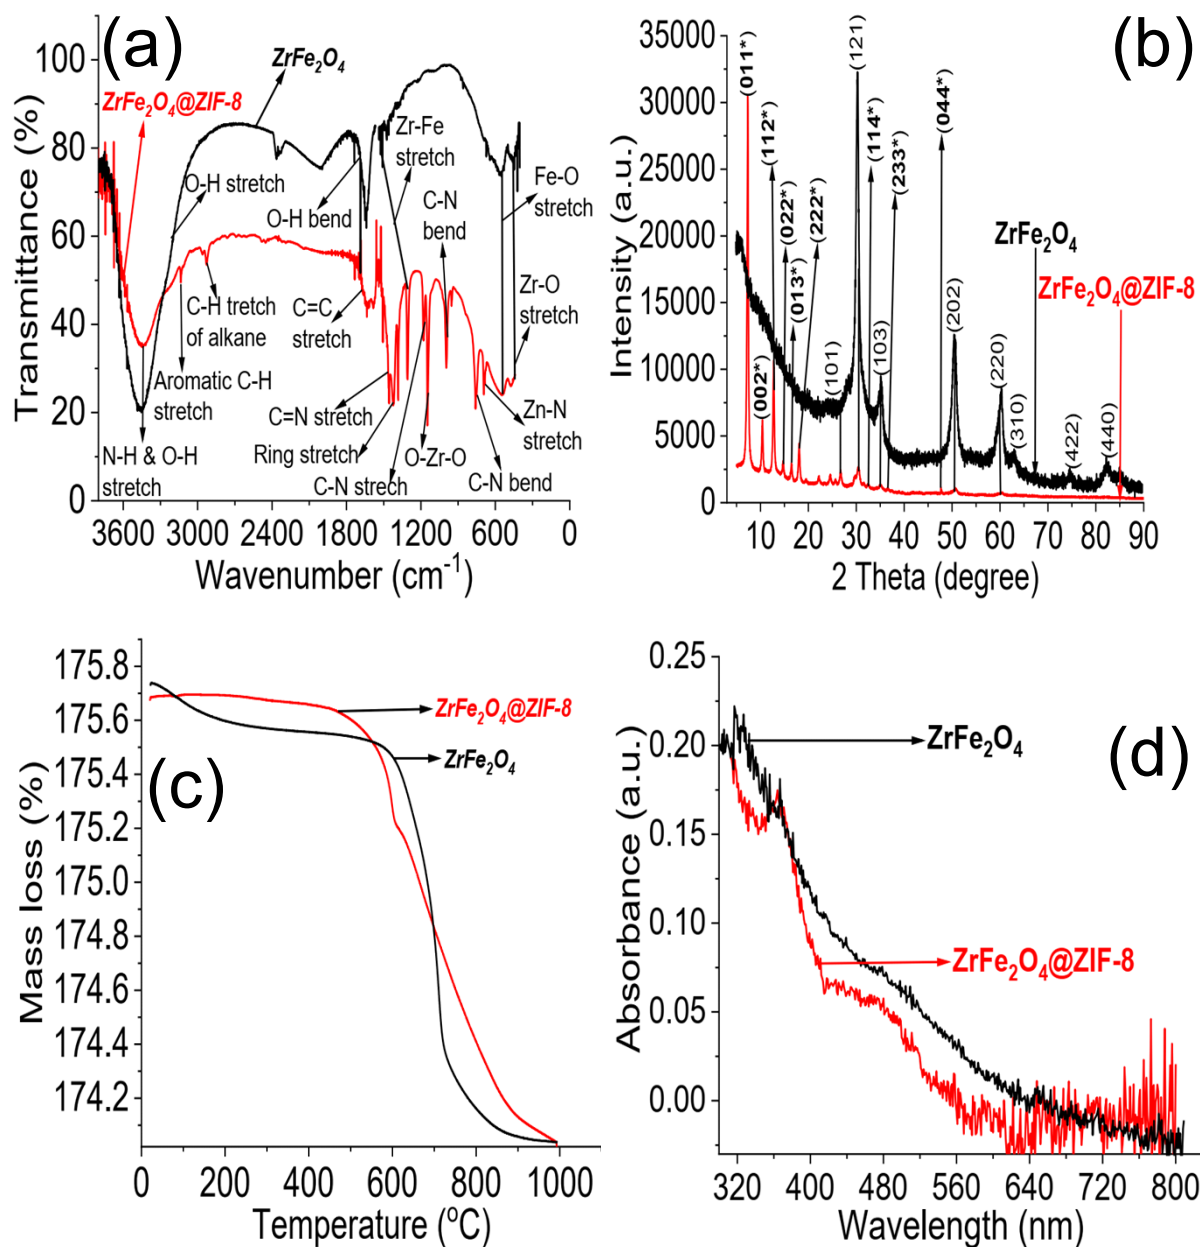

**Fig. 1:** FTIR (a), XRD (b), TGA (c) and UV-Visible spectra (d) of  $\text{ZrFe}_2\text{O}_4$  and  $\text{ZrFe}_2\text{O}_4@\text{ZIF-8}$

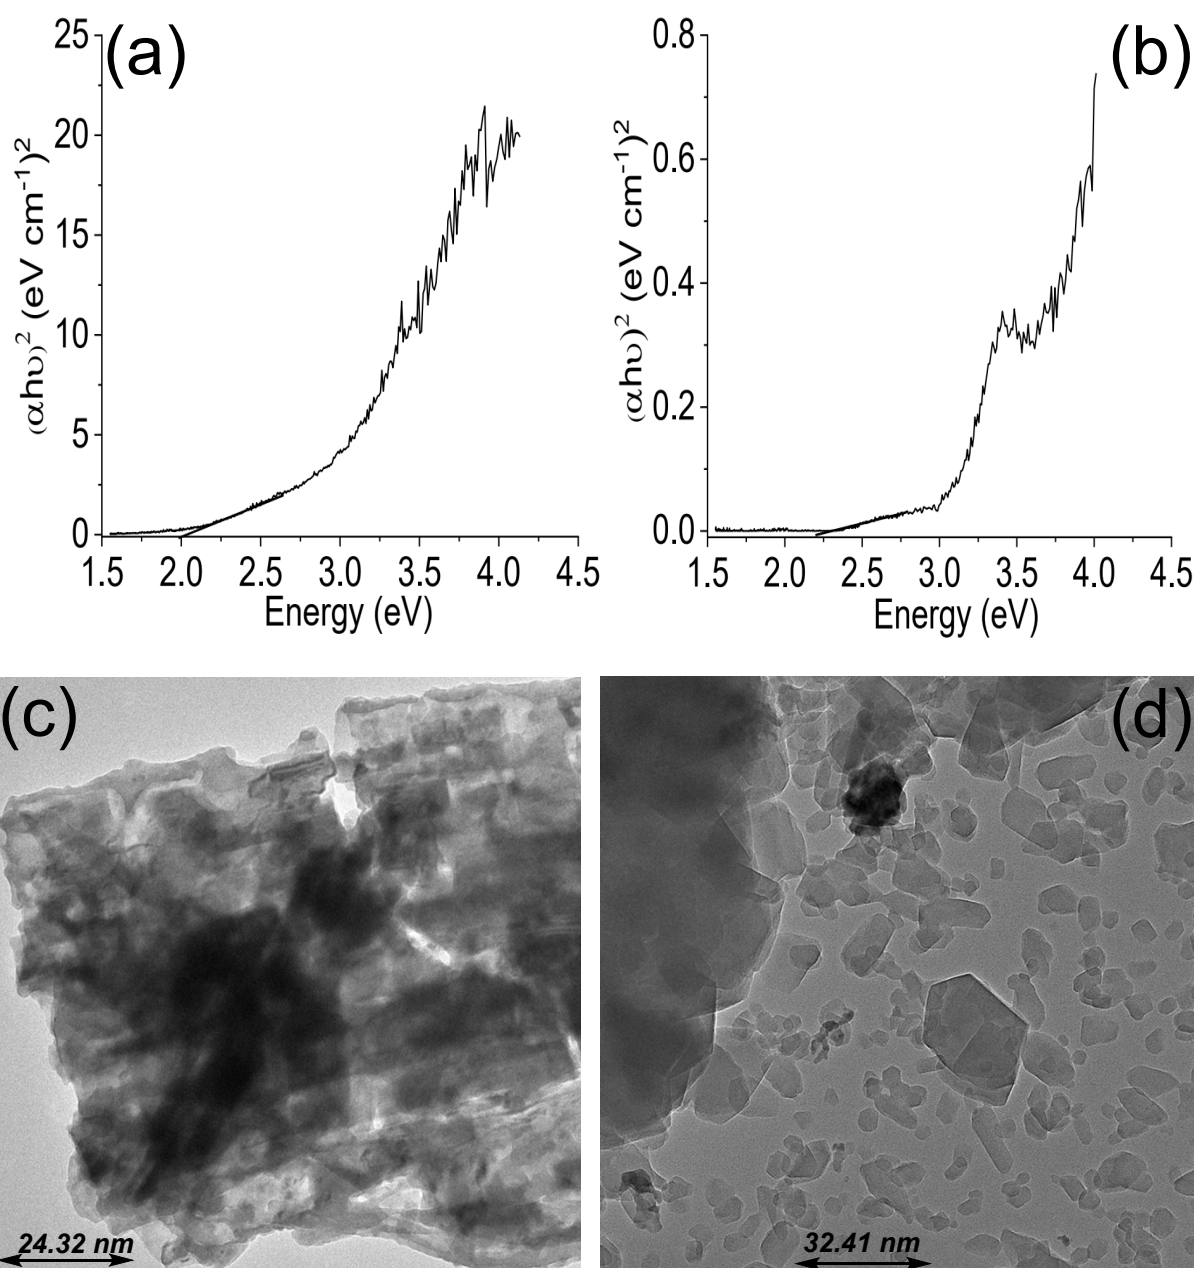

**Fig. 2:** Tauc's plot for  $\text{ZrFe}_2\text{O}_4$  (a), Tauc's plot for  $\text{ZrFe}_2\text{O}_4@\text{ZIF-8}$  (b), TEM of  $\text{ZrFe}_2\text{O}_4$  (c) and TEM of  $\text{ZrFe}_2\text{O}_4@\text{ZIF-8}$  (d)

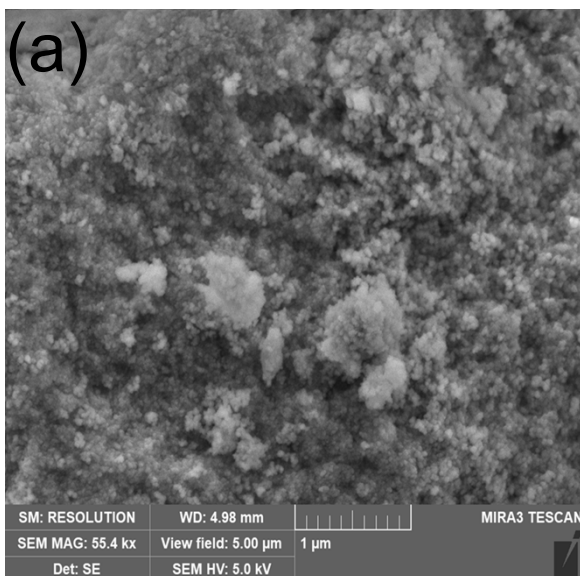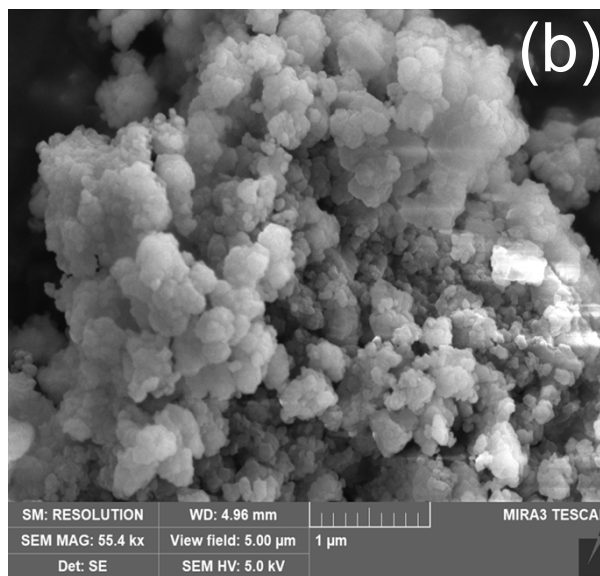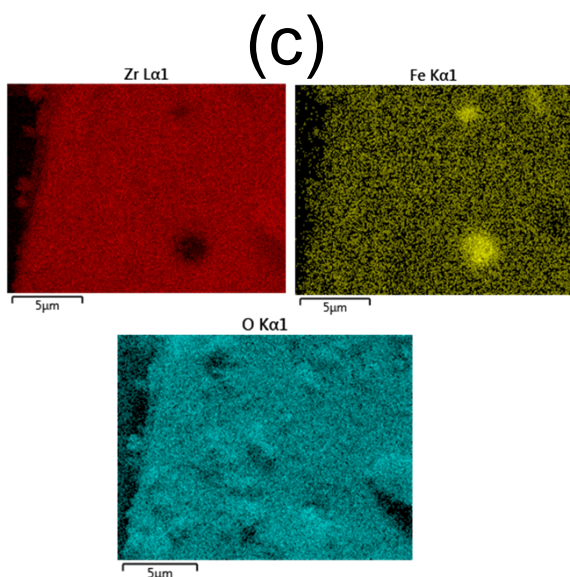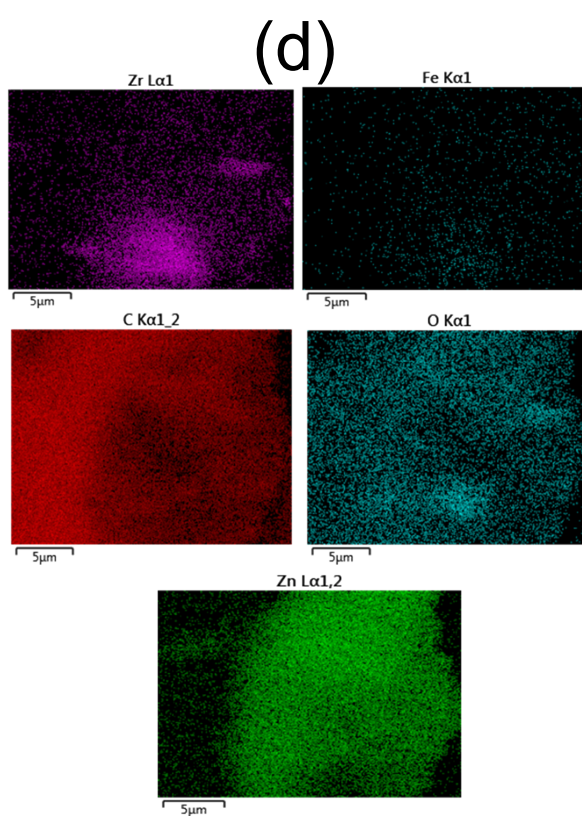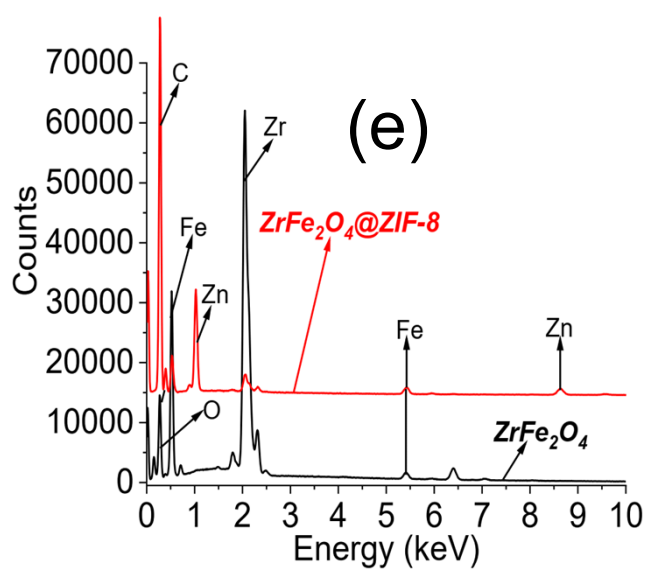

**Fig. 3:** SEM of  $\text{ZrFe}_2\text{O}_4$  (a) SEM of  $\text{ZrFe}_2\text{O}_4@\text{ZIF-8}$  (b), elemental mapping of  $\text{ZrFe}_2\text{O}_4$  (c), elemental mapping of  $\text{ZrFe}_2\text{O}_4@\text{ZIF-8}$  (d) and EDS of  $\text{ZrFe}_2\text{O}_4$  and  $\text{ZrFe}_2\text{O}_4@\text{ZIF-8}$  (e)

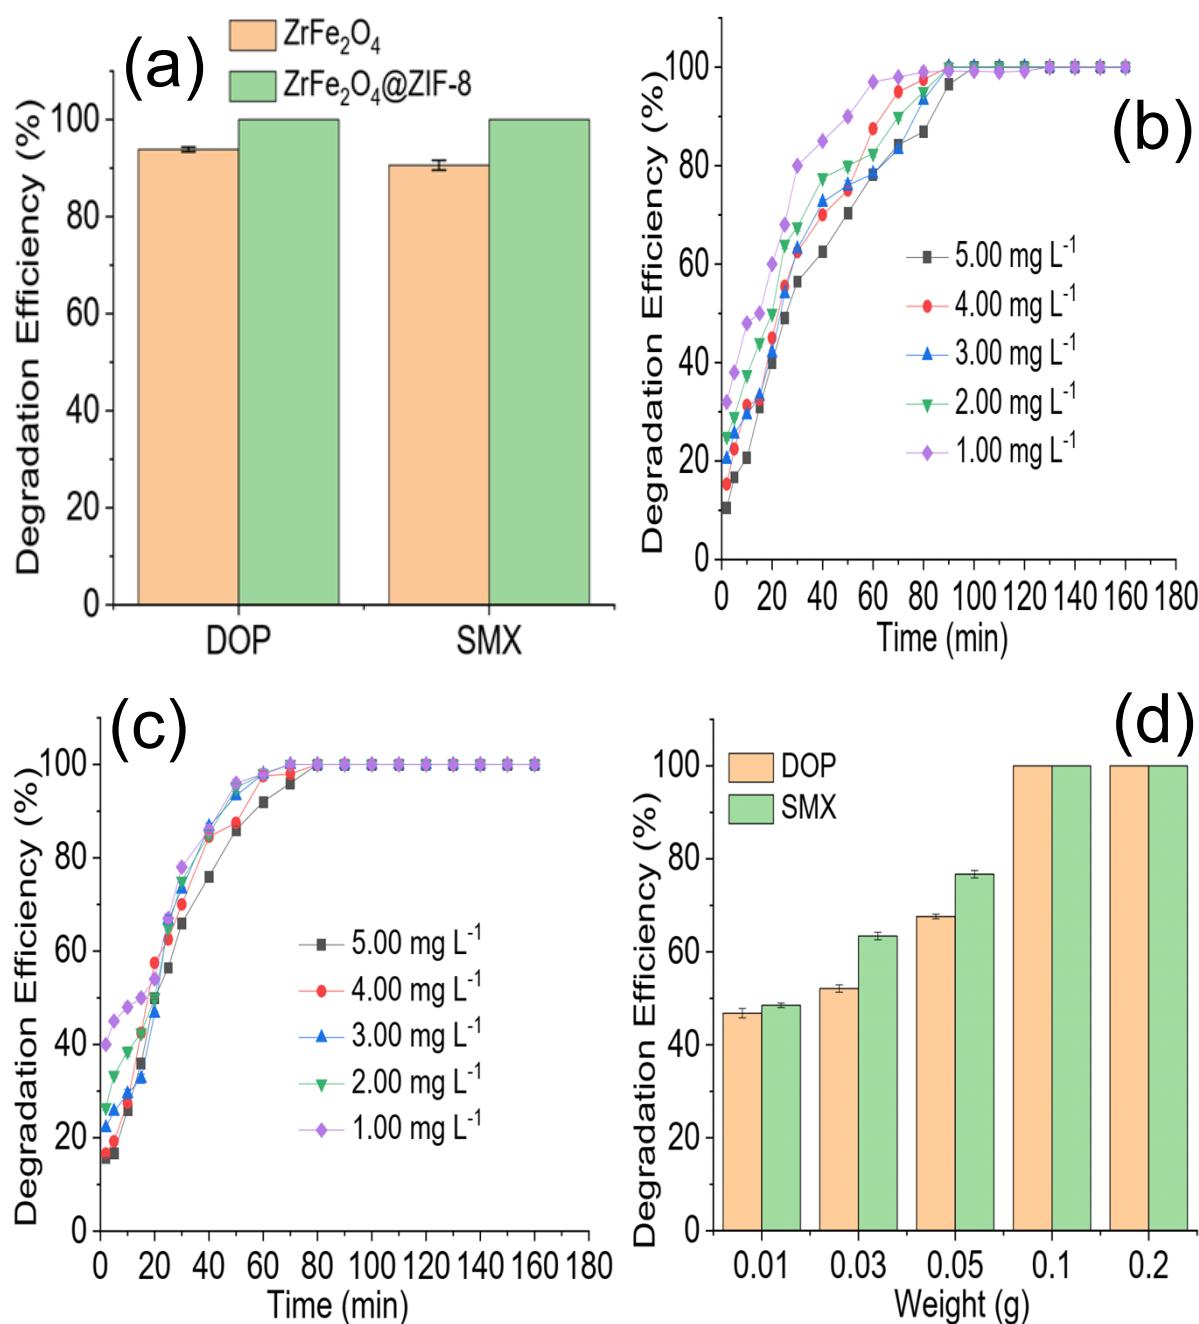

**Fig. 4:** Comparison of the preliminary degradation efficiency expressed by  $\text{ZrFe}_2\text{O}_4$  and  $\text{ZrFe}_2\text{O}_4@\text{ZIF-8}$  towards DOP and SMX (a), time dependent degradation of DOP in the presence of  $\text{ZrFe}_2\text{O}_4@\text{ZIF-8}$  at different concentration (b), time dependent degradation of SMX in the presence of  $\text{ZrFe}_2\text{O}_4@\text{ZIF-8}$  at different concentration (c) and effect of  $\text{ZrFe}_2\text{O}_4@\text{ZIF-8}$  weight on the degradation of DOP and SMX (d)

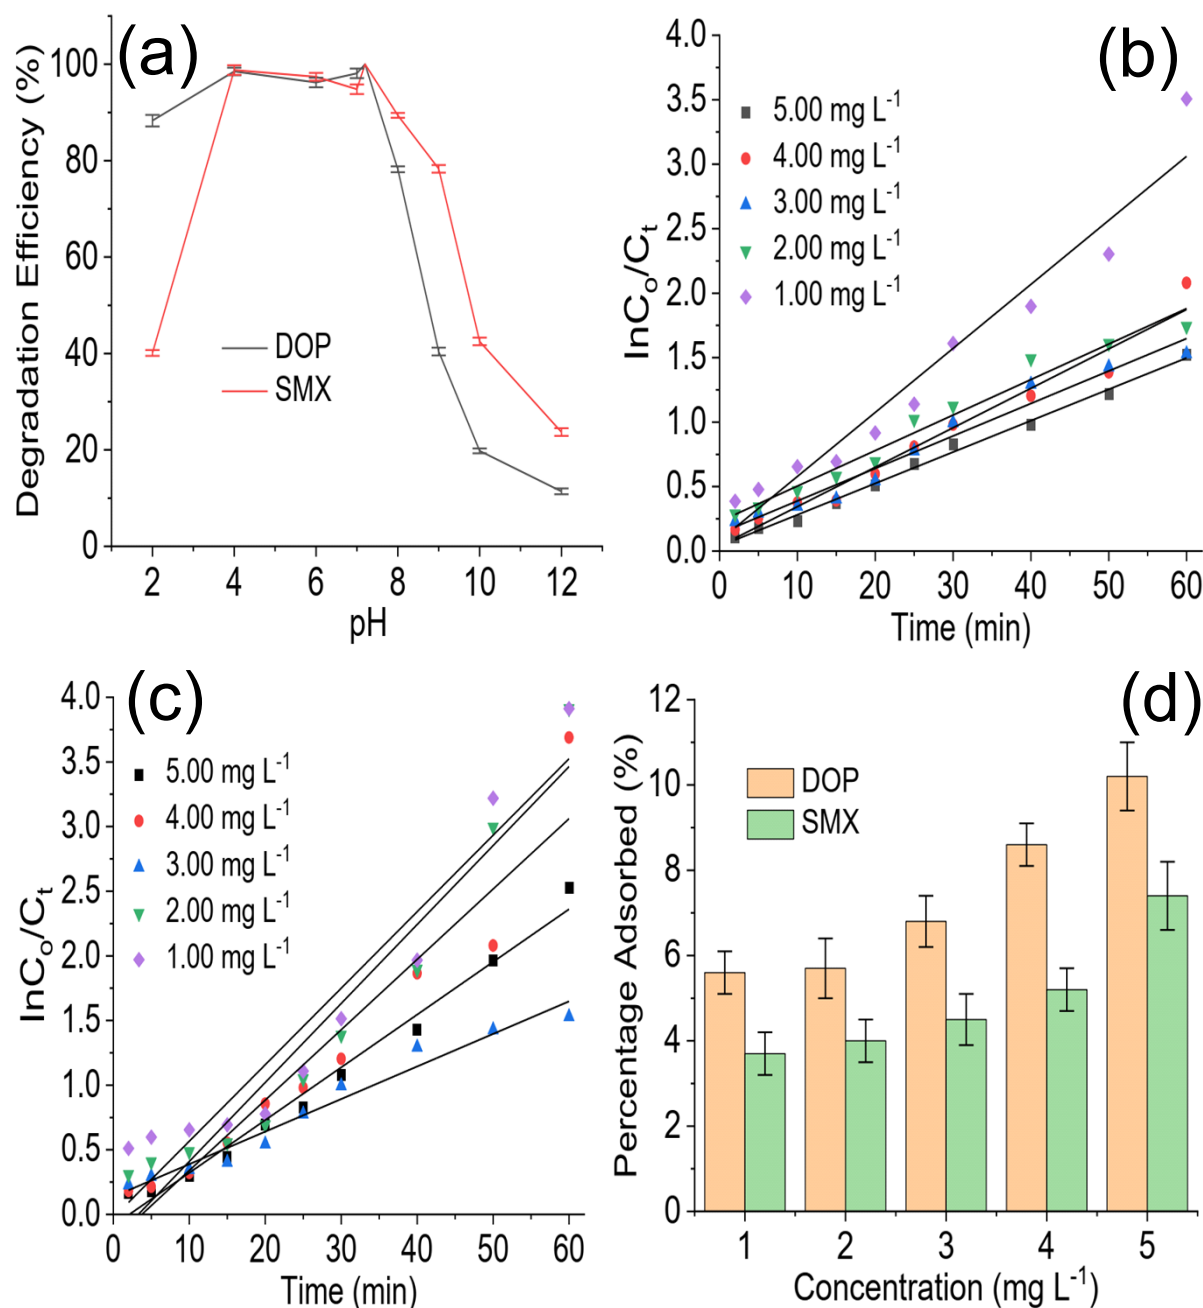

**Fig. 5:** Effect of solution pH on the degradation of DOP and SMX by ZrFe<sub>2</sub>O<sub>4</sub>@ZIF-8 (a), plot of  $\ln C_0/C_t$  versus irradiation time for the degradation of DOP (b) and SMX (c) at different solution concentrations in the presence of ZrFe<sub>2</sub>O<sub>4</sub>@ZIF-8 and percentage adsorbed during degradation of DOP and SMX by ZrFe<sub>2</sub>O<sub>4</sub>@ZIF-8 in the dark experiment (d)

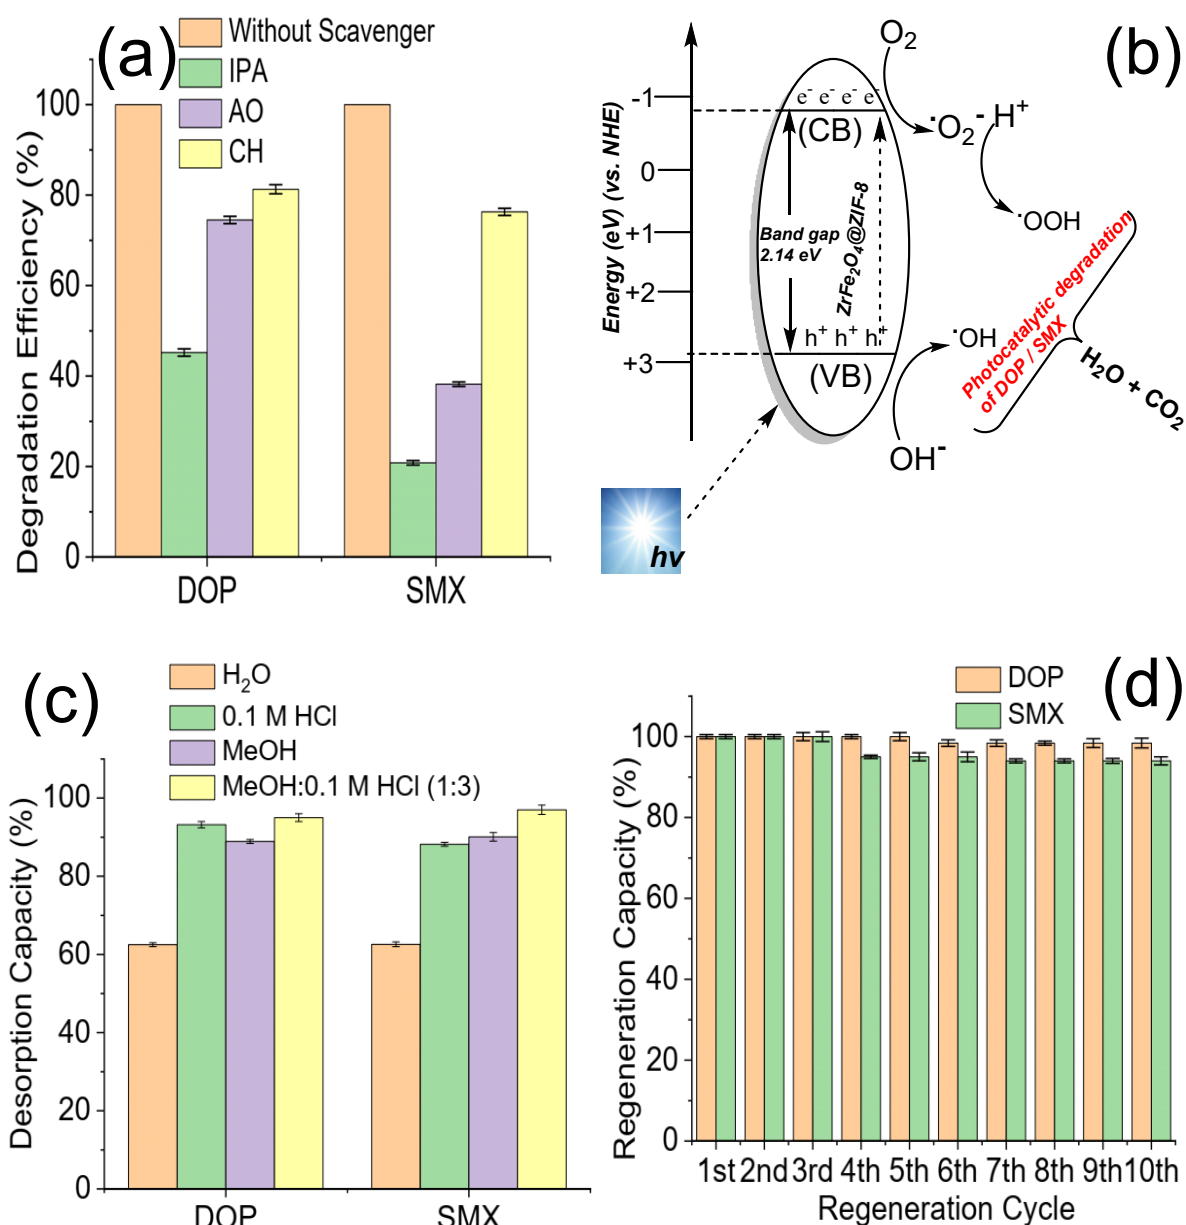

**Fig. 6:** Degradation efficiency of  $\text{ZrFe}_2\text{O}_4@ZIF-8$  towards DOP and SMX with and without ROS scavengers (a), proposed mechanism for the photodegradation of DOP and SMX (b), desorption efficiency of  $\text{ZrFe}_2\text{O}_4@ZIF-8$  after washing with different solvent systems (c) and regeneration capacity of  $\text{ZrFe}_2\text{O}_4@ZIF-8$  expressed towards DOP and SMX at different treatment cycle (d)

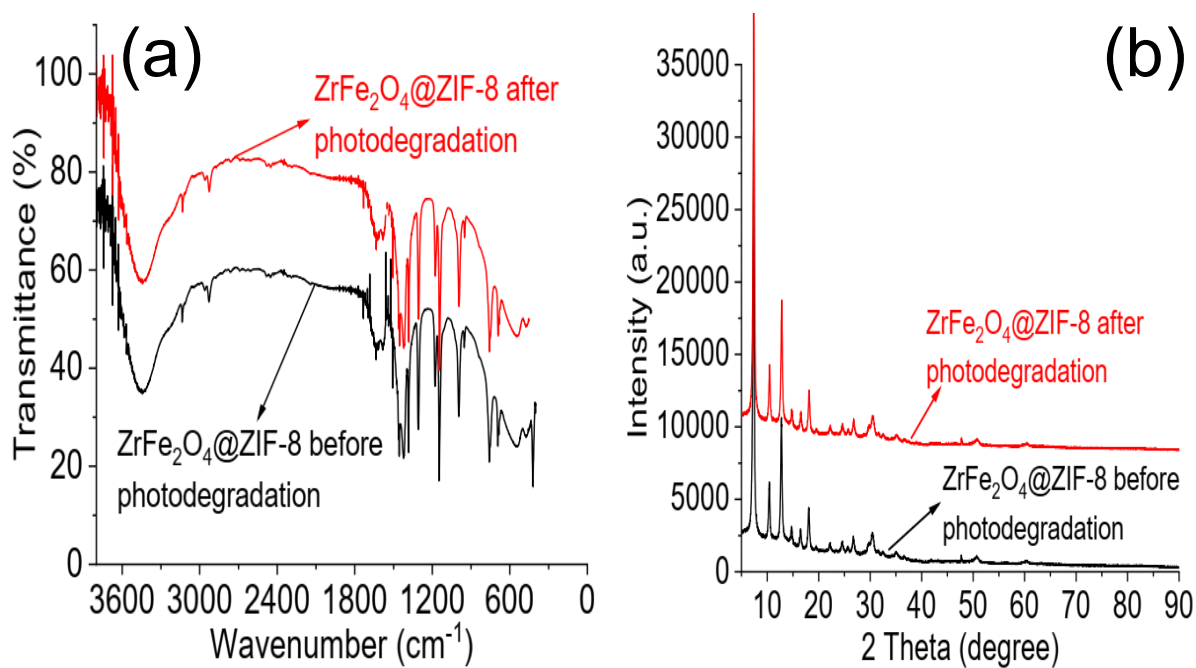

**Fig. 7:** FTIR of  $\text{ZrFe}_2\text{O}_4@ZIF-8$  before photodegradation and at 10<sup>th</sup> cycle of photodegradation (a) and XRD of  $\text{ZrFe}_2\text{O}_4@ZIF-8$  before photodegradation and at 10<sup>th</sup> cycle of photodegradation (b)
